# Supplementary material for: Temperature-regulated biomass-derived hard carbon as a superior anode for sodium-ion batteries
Source: Royal Society of Chemistry journal article supplement (doi:10.1039/d1qm00911g), 2021-01-01
Supplement: d1qm00911g1.pdf [file d1qm00911g1.pdf]

## Supporting Information

### Temperature-regulated biomass-derived hard carbon as superior anode for sodium-ion batteries

#### Figure Captions

**Fig. S1** SEM images of (a) HC-1200, (b) HC-1400, and (c) HC-1600, respectively.

**Fig. S2** peak fitting of the (002) peaks (a)HC-1000, (b)HC-1200, (c) HC-1400, (d) HC-1600, and (e) HC-2000.

**Fig. S3** XPS spectra of the O1s: (a) HC-1000, (b) HC-1200, (c) HC-1400, (d) HC-1600, and (e) HC-2000, respectively.

**Fig. S4** (a) Nitrogen adsorption-desorption isotherms and (b) BJH pore size distribution of HC-X samples.

**Table S1** Physical parameters of N<sub>2</sub> adsorption-desorption and XPS.

**Table S2** Electrochemical properties of the initial and second cycle of HC-X samples.

**Fig. S5** Galvanostatic discharge/charge curves of HC-1400 paired with the Na<sub>3</sub>V<sub>2</sub>(PO<sub>4</sub>)<sub>3</sub> cathode in coin type full cells at 0.1 C.

**Table S3** Performance comparison of HC-1400 versus other biomass derived hard carbons of SIBs reported in literature.

**Table S4** Performance comparison of hard carbon in this work versus other anodes of SIBs reported in literature.

**Fig. S6** Galvanostatic intermittent titration curve vs. time of HC-1400 electrode.

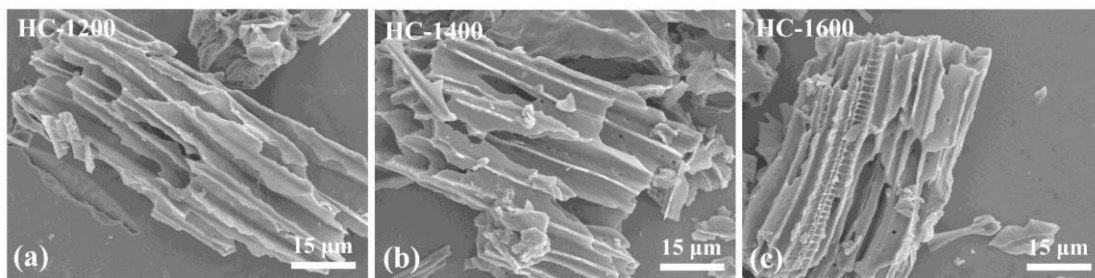

**Fig. S1** SEM images of (a) HC-1000, (b) HC-1200, (c) HC-1400, and (d) HC-1600, respectively.

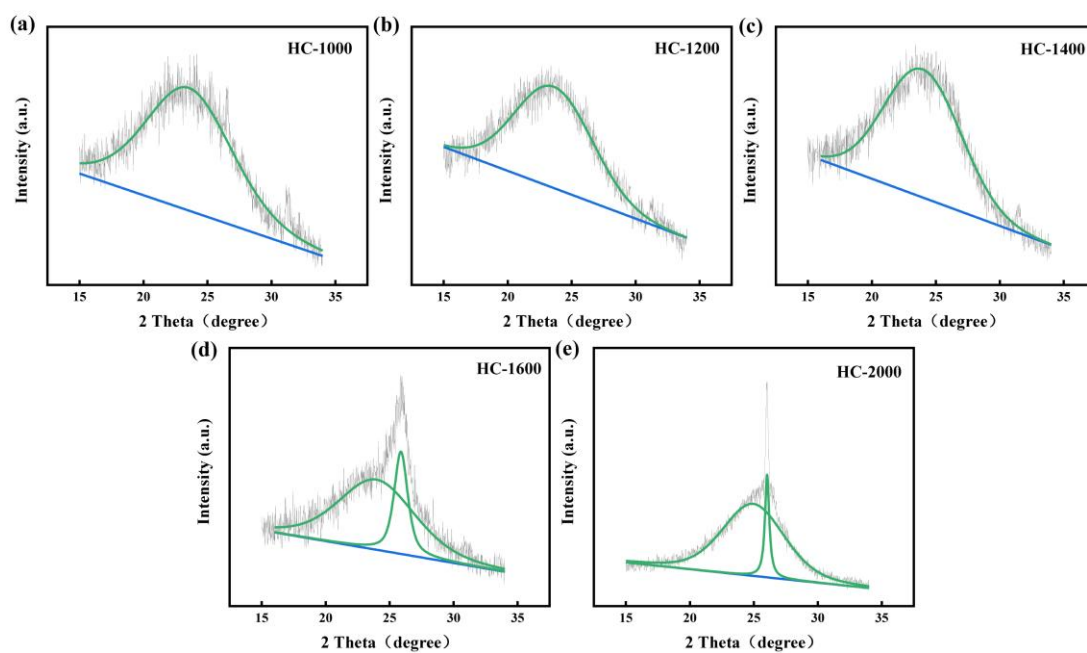

**Fig. S2** peak fitting of the (002) peaks (a) HC-1000, (b) HC-1200, (c) HC-1400, (d) HC-1600, and (e) HC-2000.

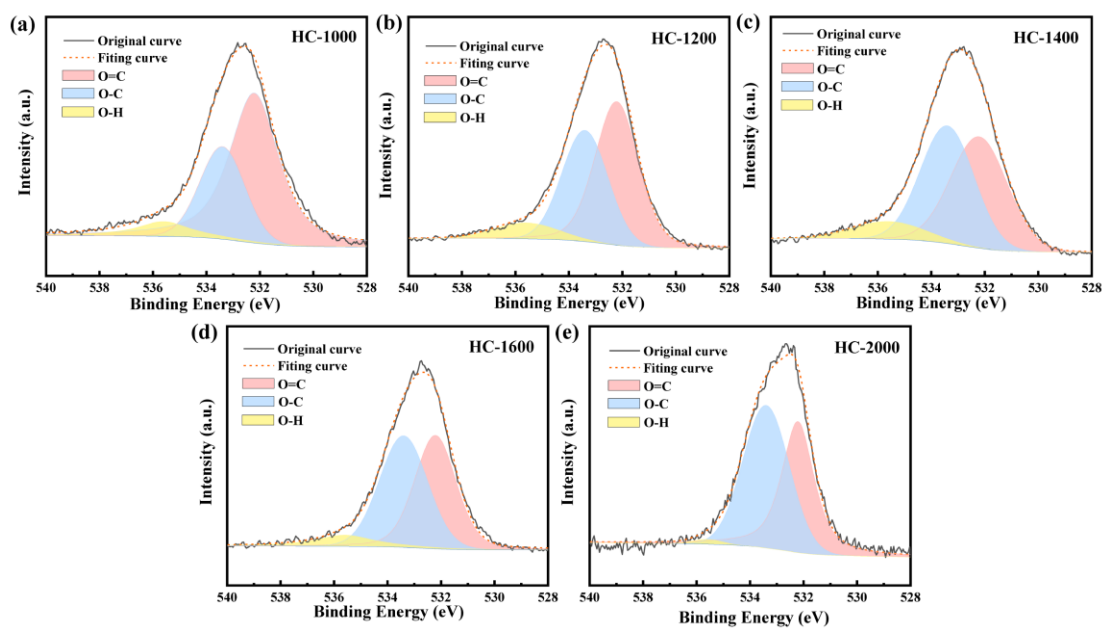

**Fig. S3** XPS spectra of the O1s: (a) HC-1000, (b) HC-1200, (c) HC-1400, (d) HC-1600, and (e) HC-2000, respectively.

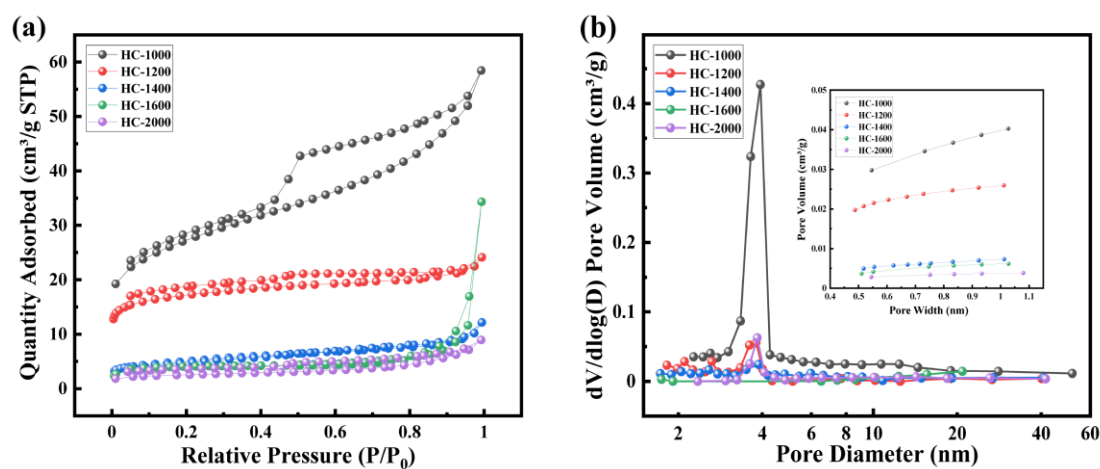

**Fig. S4** (a) Nitrogen adsorption-desorption isotherms and (b) BJH pore size distribution of HC-X samples.

**Table S1** Physical parameters obtained by N<sub>2</sub> adsorption-desorption and XPS.

| Samples | N <sub>2</sub> adsorption-desorption   |                                    |                                           |               | XPS   |       |
|---------|----------------------------------------|------------------------------------|-------------------------------------------|---------------|-------|-------|
|         | BET surface                            | Total pore volume                  | Micropore                                 | Pore diameter | C at% | O at% |
|         | area (m <sup>2</sup> g <sup>-1</sup> ) | (cm <sup>3</sup> g <sup>-1</sup> ) | volume (cm <sup>3</sup> g <sup>-1</sup> ) | (nm)          |       |       |
| HC-1000 | 93.25                                  | 0.090                              | 0.020                                     | 5.15          | 93.08 | 6.92  |

|         |       |       |       |       |       |      |
|---------|-------|-------|-------|-------|-------|------|
| HC-1200 | 54.04 | 0.037 | 0.018 | 4.46  | 94.46 | 5.54 |
| HC-1400 | 17.34 | 0.019 | 0.018 | 5.74  | 94.81 | 5.19 |
| HC-1600 | 11.99 | 0.013 | 0.005 | 12.81 | 94.99 | 5.01 |
| HC-2000 | 8.58  | 0.013 | 0.002 | 11.22 | 97.67 | 2.33 |

**Table S2** Electrochemical properties of the first and second cycle of HC-X samples.

| Samples | ICE (%) | 1 <sup>st</sup> DC <sup>a</sup> (mA h g <sup>-1</sup> ) | 1 <sup>st</sup> CC <sup>b</sup> (mA h g <sup>-1</sup> ) | 2 <sup>nd</sup> slope capacity (mA h g <sup>-1</sup> ) | 2 <sup>nd</sup> plateau capacity (mA h g <sup>-1</sup> ) | Proportion of plateau capacity (%) |
|---------|---------|---------------------------------------------------------|---------------------------------------------------------|--------------------------------------------------------|----------------------------------------------------------|------------------------------------|
| HC-1000 | 74.38   | 320.7                                                   | 238.5                                                   | 121.3                                                  | 122.7                                                    | 50.28                              |
| HC-1200 | 79.62   | 308.6                                                   | 245.7                                                   | 97.2                                                   | 156.1                                                    | 61.63                              |
| HC-1400 | 86.43   | 338.7                                                   | 292.7                                                   | 83.0                                                   | 214.2                                                    | 72.07                              |
| HC-1600 | 77.01   | 340.5                                                   | 262.2                                                   | 50.3                                                   | 209.7                                                    | 80.65                              |
| HC-2000 | 81.35   | 256.9                                                   | 209.0                                                   | 19.42                                                  | 199.0                                                    | 91.11                              |

<sup>a</sup> discharge capacity; <sup>b</sup> charge capacity.

**Table S3** Performance comparison of HC-1400 versus other biomass derived hard carbons of SIBs reported in literature.

| Biomass precursor   | ICE (%) <sup>a</sup> | ICC (mA h g <sup>-1</sup> ) <sup>b</sup> | CD (mA g <sup>-1</sup> ) <sup>c</sup> | CT (°C) <sup>d</sup> | References |
|---------------------|----------------------|------------------------------------------|---------------------------------------|----------------------|------------|
| golden berry leaves | 86.4%                | 292.7                                    | 20                                    | 1400                 | This work  |
| pine pollen         | 59.8%                | 221.5                                    | 100                                   | 900                  | [1]        |
| cherry petals       | 67.3%                | 310.2                                    | 20                                    | 1000                 | [2]        |
| Kelp                | 59.5%                | 273                                      | 25                                    | 1300                 | [3]        |
| Algal Blooms        | 52.1%                | 231.1                                    | 20                                    | 1000                 | [4]        |
| coconut endocarp    | 65.2%                | 246.7                                    | 50                                    | 1100                 | [5]        |
| corn cob            | 30.9%                | 152                                      | 100                                   | 700                  | [6]        |
| garlic peel         | 41%                  | 258                                      | 100                                   | 850                  | [7]        |
| dandelion           | 51.8%                | 136.32                                   | 50                                    | 1400                 | [8]        |

<sup>a</sup> Initial Coulomb efficiency; <sup>b</sup> Initial charge capacity (mA h g<sup>-1</sup>); <sup>c</sup> Current density; <sup>d</sup>

Carbonization temperature

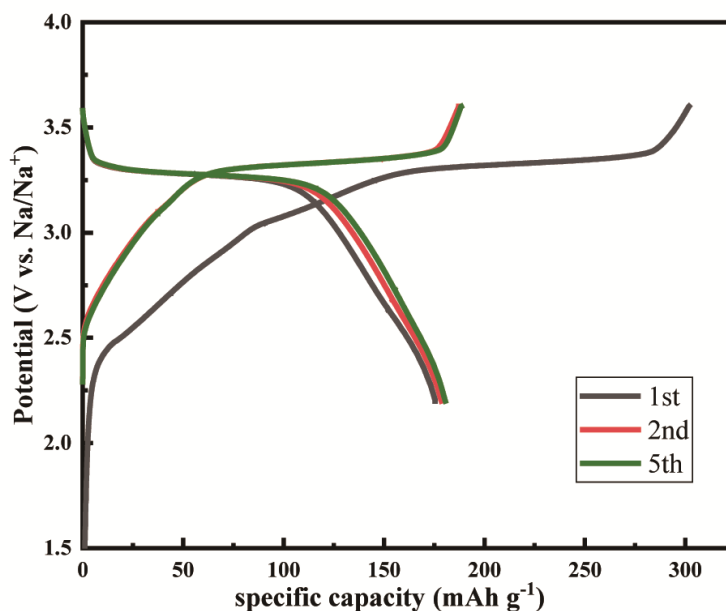

**Fig. S5** Galvanostatic discharge/charge curves of HC-1400 paired with the Na<sub>3</sub>V<sub>2</sub>(PO<sub>4</sub>)<sub>3</sub> cathode in coin type full cells at 0.1 C.

**Table S4** Performance comparison of hard carbon in this work versus other anodes of SIBs reported in literature.

| Materials                                      | Potential<br>(V) | ICE<br>(%) | Capacity<br>(mAh g <sup>-1</sup> ) | Current<br>Density<br>(mA g <sup>-1</sup> ) | Ref       |
|------------------------------------------------|------------------|------------|------------------------------------|---------------------------------------------|-----------|
| HC-1400                                        | 0.01-2.0         | 86.4       | 292.7                              | 20                                          | This work |
| Porous Sn                                      | 0.01-1.0         | 60         | 519                                | 424                                         | [9]       |
| Sb@C                                           | 0.001-2.0        | 69         | 371                                | 500                                         | [10]      |
| P@Ti <sub>3</sub> C <sub>2</sub>               | 0.005-3.0        | 80         | 230                                | 100                                         | [11]      |
| Red P                                          | 0.01-2.0         | 79.6       | 737                                | 100                                         | [12]      |
| Na <sub>2</sub> Ti <sub>3</sub> O <sub>7</sub> | 0.1-2.5          | 36         | 221                                | 35.4                                        | [13]      |
| TiO/MoS <sub>2</sub> -NFs                      | 0.01-3.0         | 84.6       | 676                                | 100                                         | [14]      |
| SnS <sub>2</sub>                               | 0.01-3.0         | 55         | 680                                | 200                                         | [15]      |

|                                                                 |          |      |       |     |      |
|-----------------------------------------------------------------|----------|------|-------|-----|------|
| Bi/Sb                                                           | 0.01–2.0 | 69   | 550   | 200 | [16] |
| GeP/rGO                                                         | 0.01–2.5 | 57   | 620   | 100 | [17] |
| MoS <sub>2</sub> /Graphene                                      | 0.01–2.8 | 52   | 432   | 100 | [18] |
| Nb <sub>2</sub> O <sub>5</sub> @S-rGO                           | 0.01–3.0 | 35   | 325   | 100 | [19] |
| Ti <sub>3</sub> C <sub>2</sub> T <sub>x</sub>                   | 0.01–3.0 | 53.8 | 295   | 500 | [20] |
| MoS <sub>2</sub> /Ti <sub>3</sub> C <sub>2</sub> T <sub>x</sub> | 0.01–3.0 | 69   | 250.9 | 100 | [21] |
| Graphite                                                        | 0.01–2.5 | 55   | 127   | 100 | [22] |
| Soft carbon                                                     | 0.01–3.0 | 40   | 200   | 50  | [23] |
| graphene                                                        | 0.01–2.8 | 62   | 255   | 100 | [24] |

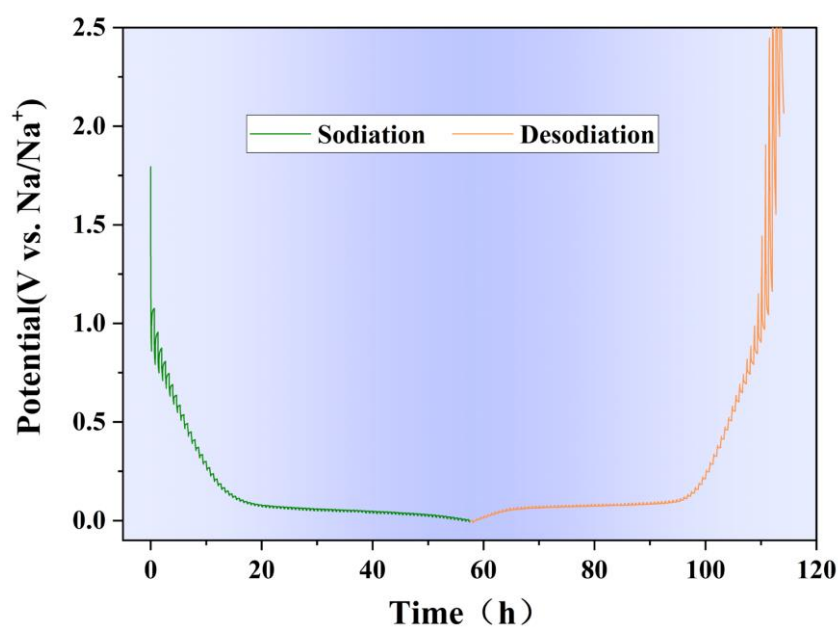

**Fig. S6** Galvanostatic intermittent titration curve vs. time of HC-1400 electrode.

## References

- [1] Y. J. Zhang, X. Li, P. Dong, G. Wu, J. Xiao, X. Y. Zeng, Y. J. Zhang and X. L. Sun, Honeycomb-like Hard Carbon Derived from Pine Pollen as High-Performance Anode Material for Sodium-Ion Batteries, *ACS Appl. Mater. Interfaces*, 2018, **10**, 42796-42803.
- [2] Z. Y. Zhu, F. Liang, Z. R. Zhou, X. Y. Zeng, D. Wang, P. Dong, J. B. Zhao, S. G.

- Sun, Y. J. Zhang and X. Li, Expanded biomass-derived hard carbon with ultrastable performance in sodium-ion batteries, *J. Mater. Chem. A.*, 2018, **6**, 1513-1522.
- [3] P. Z. Wang, X. S. Zhu, Q. Q. Wang, X. Xu, X. S. Zhou and J. C. Bao, Kelp-derived hard carbons as advanced anode materials for sodium-ion batteries, *J. Mater. Chem. A.*, 2017, **5**, 5761-5769.
- [4] X. H. Meng, P. E. Savage and D. Deng, Trash to Treasure: From Harmful Algal Blooms to High-Performance Electrodes for Sodium-Ion Batteries, *Environ. Sci. Technol.*, 2015, **49**, 12543-12550.
- [5] F. Wu, L. Liu, Y. F. Yuan, Y. Li, Y. Bai, T. Li, J. Lu and C. Wu, Expanding Interlayer Spacing of Hard Carbon by Natural K<sup>+</sup> Doping to Boost Na-Ion Storage, *ACS Appl. Mater. Interfaces*, 2018, **10**, 27030-27038.
- [6] Q. Jiang, Z. H. Zhang, S. Y. Yin, Z. P. Guo, S. Q. Wang and C. Q. Feng, Biomass carbon micro/nano-structures derived from ramie fibers and corncobs as anode materials for lithium-ion and sodium-ion batteries, *Appl. Surf. Sci.*, 2016, **379**, 73-82.
- [7] V. Selvamani, R. Ravikumar, V. Suryanarayanan, D. Velayutham and S. Gopukumar, Garlic peel derived high capacity hierarchical N-doped porous carbon anode for sodium/lithium ion cell, *Electrochim. Acta.*, 2016, **190**, 337-345.
- [8] C. W. Wang, J. F. Huang, H. Qi, L. Y. Cao, Z. W. Xu, Y. Y. Cheng, X. X. Zhao and J. Y. Li, Controlling pseudographitic domain dimension of dandelion derived biomass carbon for excellent sodium-ion storage, *J. Power Sources*, 2017, **358**,

- 85-92.
- [9] C. Kim, K. Y. Lee, I. Kim, J. Park, G. Cho, K. W. Kim, J. H. Ahn and H. J. Ahn, Long-term cycling stability of porous Sn anode for sodium-ion batteries, *J. Power Sources*, 2016, **317**, 153-158.
- [10] J. Duan, W. Zhang, C. Wu, Q. J. Fan, W. X. Zhang, X. L. Hu and Y. H. Huang, Self-wrapped Sb/C nanocomposite as anode material for High-performance sodium-ion batteries, *Nano Energy*, 2015, **16**, 479-487.
- [11] R. J. Meng, J. M. Huang, Y. T. Feng, L. H. Zu, C. X. Peng, L. R. Zheng, L. Zheng, Z. B. Chen, G. L. Liu, B. J. Chen, Y. L. Mi and J. H. Yang, Black Phosphorus Quantum Dot/Ti<sub>3</sub>C<sub>2</sub> MXene Nanosheet Composites for Efficient Electrochemical Lithium/Sodium-Ion Storage, *Adv. Energy Mater.*, 2018, **8**, 1801514.
- [12] L. Q. Zhu, Z. X. Zhu, J. B. Zhou and Y. T. Qian, Kirkendall effect modulated hollow red phosphorus nanospheres for high performance sodium-ion battery anodes, *Chem. Commun.*, 2020, **56**, 11795-11798.
- [13] J. F. Ni, S. D. Fu, C. Wu, Y. Zhao, J. Maier, Y. Yu and L. Li, Superior Sodium Storage in Na<sub>2</sub>Ti<sub>3</sub>O<sub>7</sub> Nanotube Arrays through Surface Engineering, *Adv. Energy Mater.*, 2016, **6**, 1502568.
- [14] H. N. He, X. L. Li, D. Huang, J. Y. Luan, S. L. Liu, W. K. Pang, D. Sun, Y. G. Tang, W. Z. Zhou, L. R. He, C. H. Zhang, H. Y. Wang and Z. P. Guo, Electron-Injection-Engineering Induced Phase Transition toward Stabilized 1T-MoS<sub>2</sub> with Extraordinary Sodium Storage Performance, *ACS Nano*, 2021, **15**, 8896-8906.
- [15] Y. Jiang, M. Wei, J. K. Feng, Y. C. Ma and S. L. Xiong, Enhancing the cycling



- stability of Na-ion batteries by bonding SnS<sub>2</sub> ultrafine nanocrystals on amino-functionalized graphene hybrid nanosheets, *Energy Environ. Sci.*, 2016, **9**, 1430-1438.
- [16] H. Gao, J. Z. Niu, C. Zhang, Z. Q. Peng and Z. H. Zhang, A Dealloying Synthetic Strategy for Nanoporous Bismuth-Antimony Anodes for Sodium Ion Batteries, *ACS Nano*, 2018, **12**, 3568-3577.
- [17] F. Yang, J. Hong, J. Hao, S. Zhang, G. Liang, J. Long, Y. Liu, N. Liu, W. K. Pang, Ultrathin Few-Layer GeP Nanosheets via Lithiation-Assisted Chemical Exfoliation and Their Application in Sodium Storage, *Adv. Energy Mater.*, 2020, **10**, 1903826.
- [18] D. Sun, D. L. Ye, P. Liu, Y. G. Tang, J. Guo, L. Z. Wang and H. Y. Wang, MoS<sub>2</sub>/Graphene Nanosheets from Commercial Bulky MoS<sub>2</sub> and Graphite as Anode Materials for High Rate Sodium-Ion Batteries, *Adv. Energy Mater.*, 2018, **8**, 1702383.
- [19] F. F. Liu, X. L. Cheng, R. Xu, Y. Wu, Y. Jiang and Y. Yu, Binding Sulfur-Doped Nb<sub>2</sub>O<sub>5</sub> Hollow Nanospheres on Sulfur-Doped Graphene Networks for Highly Reversible Sodium Storage, *Adv. Funct. Mater.*, 2018, **28**, 1800394.
- [20] M. Q. Zhao, X. Q. Xie, C. E. Ren, T. Makaryan, B. Anasori, G. X. Wang and Y. Gogotsi, Hollow MXene Spheres and 3D Macroporous MXene Frameworks for Na-Ion Storage, *Adv. Mater.*, 2017, **29**, 1702410.
- [21] Y. T. Wu, P. Nie, J. M. Jiang, B. Ding, H. Dou and X. G. Zhang, MoS<sub>2</sub>-Nanosheet-Decorated 2D Titanium Carbide (MXene) as High-Performance Anodes for

- Sodium-Ion Batteries, *Chemelectrochem*, 2017, **4**, 1560-1565.
- [22] H. Kim, J. Hong, Y. U. Park, J. Kim, I. Hwang and K. Kang, Sodium Storage Behavior in Natural Graphite using Ether-based Electrolyte Systems, *Adv. Funct. Mater.*, 2015, **25**, 534-541.
- [23] B. Cao, H. Liu, B. Xu, Y. F. Lei, X. H. Chen and H. H. Song, Mesoporous soft carbon as an anode material for sodium ion batteries with superior rate and cycling performance, *J. Mater. Chem. A*, 2016, **4**, 6472-6478.
- [24] J. Ding, H. L. Wang, Z. Li, A. Kohandehghan, K. Cui, Z. W. Xu, B. Zahiri, X. H. Tan, E. M. Lotfabad, B. C. Olsen and D. Mitlin, Carbon Nanosheet Frameworks Derived from Peat Moss as High Performance Sodium Ion Battery Anodes, *ACS Nano*, 2013, **7**, 11004-11015.
